# Supplementary material
Source: PubMed Central journal article supplement (PMC7860244)
Supplement: ao0c05765_si_001.pdf [file ao0c05765_si_001.pdf]

## Supporting Information

### **Plasticization of poly(3-hydroxybutyrate-co-3-hydroxyvalerate) with an oligomeric polyester: Miscibility and effect of the microstructure and plasticizer distribution on the thermal and mechanical properties.**

*Jacqueline L. Barbosa, Giovanni B. Perin, Maria Isabel Felisberti\**

Institute of Chemistry, University of Campinas, P.O. BOX: 6154, 13083-970, Campinas  
- SP, Brazil

### **Table of contents**

| Section                                                     | Page |
|-------------------------------------------------------------|------|
| 1. Thermogravimetric curves and their derivative curves     | S2   |
| 2. Deconvolution of DMA curves                              | S3   |
| 3. Estimation of the PLAP composition in amorphous phases   | S5   |
| 4. SAXS analysis                                            | S7   |
| 5. Digital images of the spherulites                        | S10  |
| 6. Determination of the Flory-Huggins interaction parameter | S11  |
| 7. Mechanical properties                                    | S13  |
| 8. Efficiency of plasticizers – a short review              | S14  |
| 9. <sup>1</sup> H and <sup>13</sup> C NMR spectra of PHBV   | S19  |
| 10. <sup>1</sup> H and <sup>13</sup> C NMR spectra of PLAP  | S20  |

1. Thermogravimetric curves and their derivative curves

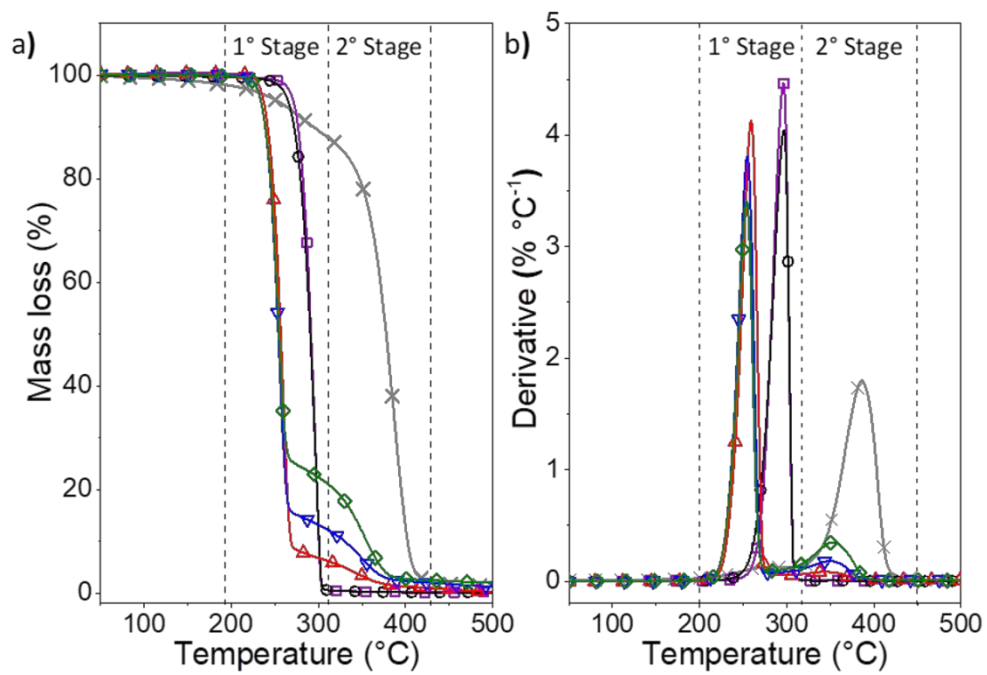

Figure S1: a) TGA curves and b) derivative curves for unprocessed PHBV (□) and PLAP (x), and for the processed PHBV (o) and its formulations with PLAP mass fractions of 0.1 (△), 0.2 (▽) and 0.3 (◇).

## 2. Deconvolution of DMA curves

The  $E''$  vs T curves deconvoluted by Gaussian curves are presented in Figure S2.

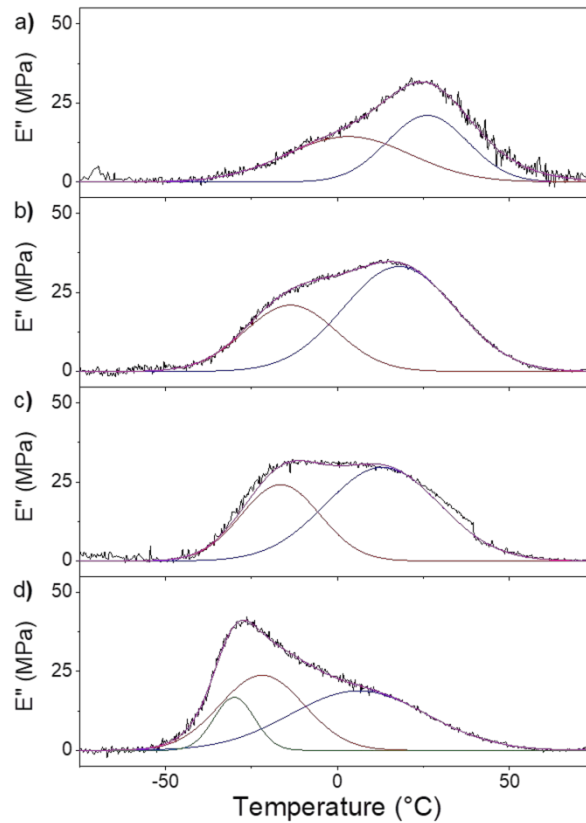

Figure S2:  $E''$  vs T curves (black line) and their Gaussians for a) pure PHBV and its formulations with PLAP mass fractions of b) 0.1, c) 0.2, and d) 0.3.

The deconvolution of the  $\tan \delta$  vs T and  $E''$  vs T curves using Gaussians allows for the determination of the  $T_g$  of the rigid and mobile amorphous phases as the temperatures corresponding to the maximums of the Gaussians, which are summarized in Table S1 and S2.

Table S1:  $T_g$  and PHB and PLAP mass fraction in the rigid, mobile, and PLA-rich mobile amorphous phases determined from the deconvoluted  $\tan \delta$  vs T curves for PHBV and its formulations with PLAP mass fractions of 0.1, 0.2, and 0.3.

| $w_{PLAP}$ | Rigid amorphous phase |            |            | Mobile amorphous phase |            |            | PLAP-rich mobile amorphous phase |            |            |
|------------|-----------------------|------------|------------|------------------------|------------|------------|----------------------------------|------------|------------|
|            | $T_g$ (°C)            | $w_{PHBV}$ | $w_{PLAP}$ | $T_g$ (°C)             | $w_{PHBV}$ | $w_{PLAP}$ | $T_g$ (°C)                       | $w_{PHBV}$ | $w_{PLAP}$ |
| 0.0        | 28                    | 1.00       | 0.00       | 3                      | 1.00       | 0.00       | ---                              | ---        | ---        |
| 0.1        | 24                    | 0.94       | 0.06       | -8                     | 0.71       | 0.29       | ---                              | ---        | ---        |
| 0.2        | 22                    | 0.91       | 0.09       | -10                    | 0.66       | 0.34       | ---                              | ---        | ---        |
| 0.3        | 12                    | 0.77       | 0.23       | -10                    | 0.64       | 0.36       | -27.0                            | 0.13       | 0.87       |

Table S2:  $T_g$  and PHB and PLAP mass fraction in the rigid, mobile and PLA-rich mobile amorphous phases determined from the deconvoluted  $E''$  vs T curves for PHBV and its formulations with PLAP mass fractions of 0.1, 0.2, and 0.3.

| $w_{PLAP}$ | Rigid amorphous phase |            |            | Mobile amorphous phase |            |            | PLAP-rich mobile amorphous phase |            |            |
|------------|-----------------------|------------|------------|------------------------|------------|------------|----------------------------------|------------|------------|
|            | $T_g$ (°C)            | $w_{PHBV}$ | $w_{PLAP}$ | $T_g$ (°C)             | $w_{PHBV}$ | $w_{PLAP}$ | $T_g$ (°C)                       | $w_{PHBV}$ | $w_{PLAP}$ |
| 0.0        | 26                    | 1.00       | 0.00       | 3                      | 1.00       | 0.00       | ---                              | ---        | ---        |
| 0.1        | 18                    | 0.88       | 0.12       | -14                    | 0.53       | 0.47       | ---                              | ---        | ---        |
| 0.2        | 13                    | 0.80       | 0.20       | -16                    | 0.46       | 0.54       | ---                              | ---        | ---        |
| 0.3        | 6                     | 0.70       | 0.30       | -22                    | 0.30       | 0.70       | -30                              | 0.04       | 0.96       |

### 3. Estimation of the PLAP composition in amorphous phases

The PLAP mass fractions in the mobile and rigid amorphous phases were graphically estimated from the  $T_g$  of the mobile and rigid amorphous phases for pure PHBV (determined from  $\tan \delta$  vs T and  $E''$  vs T curves) and for PLAP (determined by DSC). The composition-dependence of the  $T_g$  of the mobile and rigid amorphous phases were plotted by using the Fox equation<sup>76</sup> (Equation S1), assuming that it adequately describes the dependence of  $T_g$  on the formulations composition, and presented in Figure S3.

$$\frac{1}{T_g} = \frac{w_{PHBV}}{T_{g,PHBV}} + \frac{(1-w_{PHBV})}{T_{g,PLAP}} \quad \text{Equation S1}$$

where  $T_{g,PHBV}$ ,  $T_{g,PLAP}$ , and  $T_g$  are the glass transition temperatures of the pure PHBV, pure PLAP, and of the mobile or rigid amorphous phase, respectively.

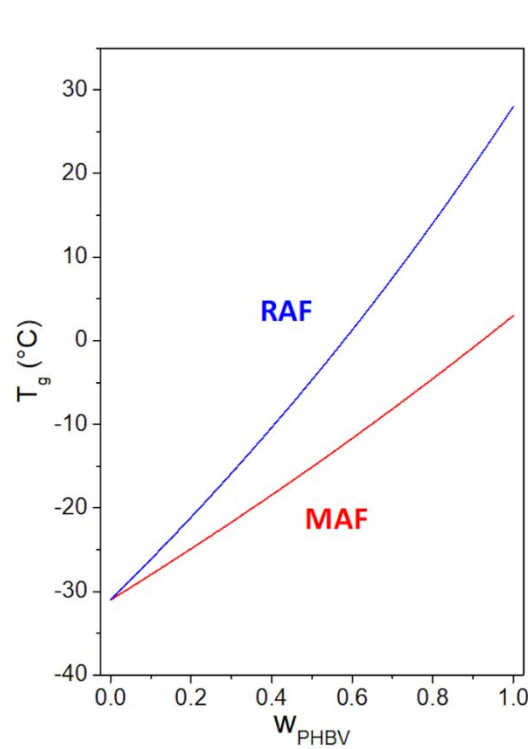

Figure S3:  $T_g$  of the mobile (-) and rigid (-) amorphous phases as a function of the PHBV mass fraction in the formulations with PLAP predicted by the Fox equation.

The compositions of each amorphous phase in the PHBV formulations (determined from  $\tan \delta$  vs  $T$  and  $E''$  vs  $T$  curves) are presented in Tables S1 and S2, respectively. The  $T_g$  of each phase and the PHBV and PLAP mass fraction ( $w_i$ ) in each phase (i) for pure PHBV and its plasticized formulations (determined using data from  $E''$  vs  $T$  curves) are presented in Figure 4S.

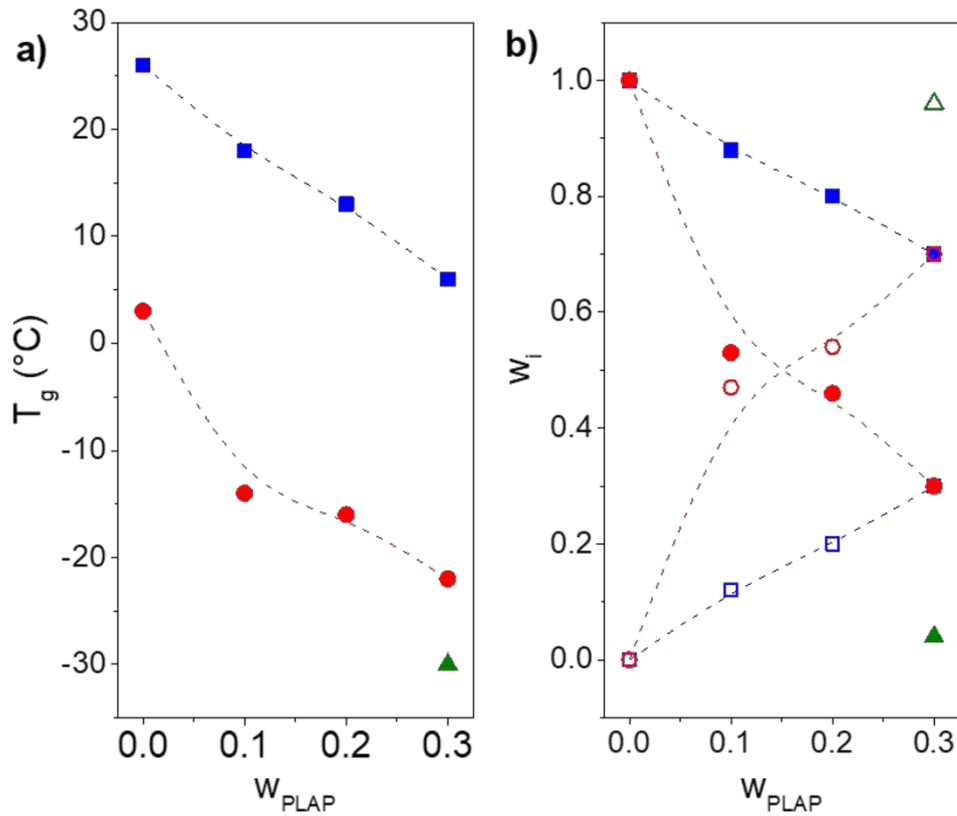

Figure S4: a)  $T_g$  and b) the PHBV (closed symbols) and PLAP (open symbols) mass fraction in the amorphous phases as a function of the PLAP mass fraction in the formulations: rigid (■, □), mobile (●, ○), and PLAP-rich mobile amorphous phases (▲, △). Data determined from  $E''$  vs  $T$  curves.

#### 4. SAXS analysis

The Lorentz corrected SAXS for aged and recrystallized samples of processed PHBV and its formulations with PLAP are presented in Figure S5.

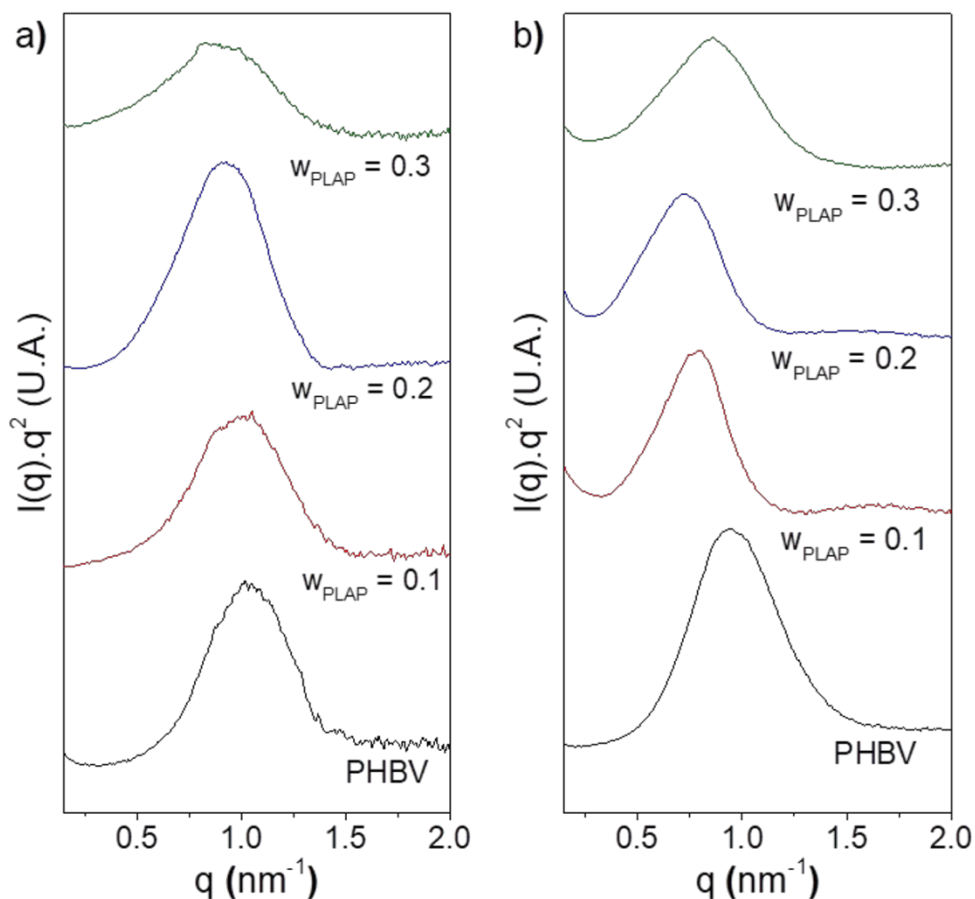

Figure S5: Lorentz-corrected  $I(q)q^2$  vs  $q$  curves for a) aged and b) recrystallized PHBV (-) and its formulations with PLAP mass fractions of 0.1 (-), 0.2 (-), and 0.3 (-).

The long period ( $L_p$ ), the crystalline lamella ( $l_c$ ), and the amorphous layer ( $l_a$ ) were determined by using SAXDAT software. Based on the lamellar stack model of the polymer structure the morphological parameters were calculated using a correlation function as an inverse Fourier transform of the intensity distribution function.<sup>73</sup> From the correlation function, the thickness of the two phases (crystalline and amorphous) was determined, and the attribution of each phase was performed by comparing the volumetric degree of crystallinity of the formulation ( $\Phi_c$ , equation S2) with the linear degree of crystallinity within the lamellar stacks ( $\phi_c^{\text{lin}}$ , equation S3):<sup>74</sup>

$$\Phi_c = \frac{\chi_c / \rho_c}{\chi_c / \rho_c - PHBV + \frac{(w_{PHB} - \chi_c)}{\rho_a} + \frac{w_{PLAP}}{\rho_{PLAP}}} \quad \text{Equation S2}$$

where  $\chi_c$  is the degree of crystallinity measured by DSC,  $\rho_c$  and  $\rho_a$  are the densities of 100% crystalline PHB ( $\rho_c = 1.26 \text{ g cm}^{-3}$ ) and completely amorphous PHB ( $\rho_c = 1.18 \text{ g cm}^{-3}$ )<sup>4</sup>,  $\rho_{PLAP}$  is the PLAP density ( $\rho_{PLAP} = 1.18 \text{ g cm}^{-3}$ , determined by using a pycnometer), and  $w_{PHBV}$  and  $w_{PLAP}$  are the PHBV and PLAP mass fraction in the formulations.

$$\phi_c^{lin} = l_c / L_p \quad \text{Equation S3}$$

The correlation functions for aged and recrystallized samples for processed PHBV and its formulations with PLAP are presented in Figure S6.

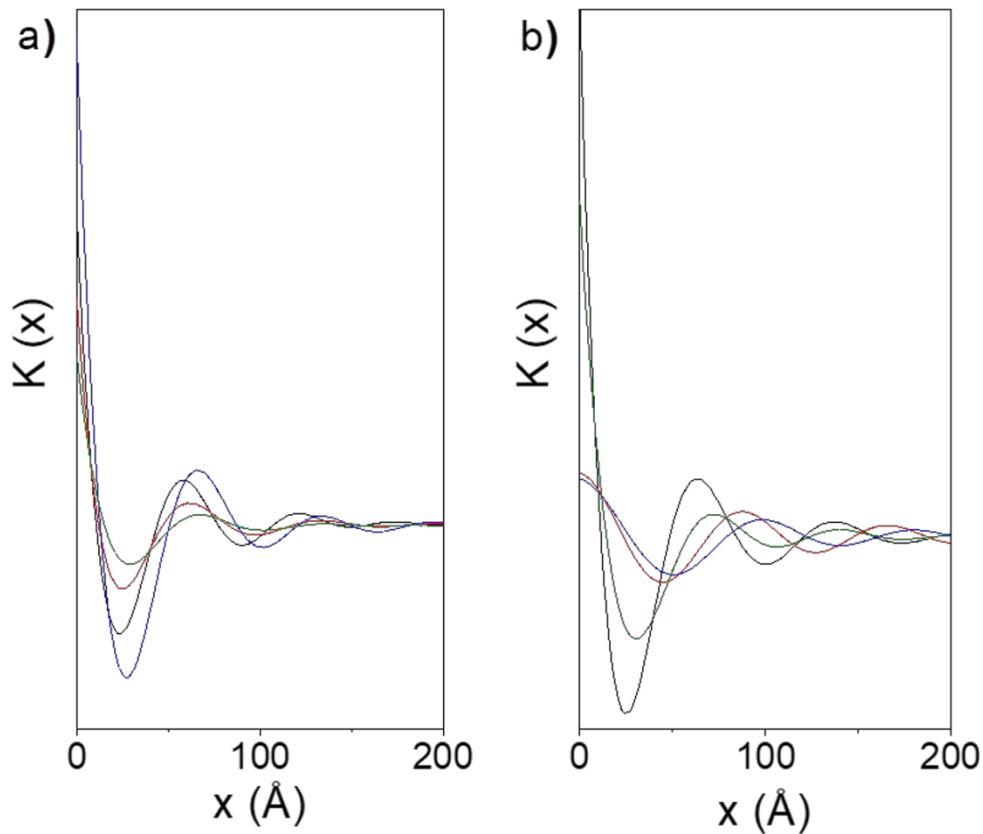

Figure S6: Correlation functions for a) aged and b) recrystallized samples for processed PHBV (-) and its formulations with PLAP mass fractions of 0.1 (-), 0.2 (-), and 0.3 (-).



The structural parameters determined by SAXS are summarized in Table S3.

Table S3: Scattering vector at the peak maximum ( $q_{\max}$ ), long period ( $L_p$ ), crystalline lamellae and amorphous layers thickness ( $l_c$  and  $l_a$ , respectively), linear degree of crystallinity within the lamellar stacks ( $\phi_c^{\text{lin}}$ ), and the volumetric degree of crystallinity ( $\Phi_c$ ) for aged specimens and thin films freshly crystallized at 70°C for 1 h.

| Aged specimens    |                                    |               |               |               |          |                       | Films freshly crystallized at 70°C for 1 h |               |               |               |          |                       |
|-------------------|------------------------------------|---------------|---------------|---------------|----------|-----------------------|--------------------------------------------|---------------|---------------|---------------|----------|-----------------------|
| $w_{\text{PLAP}}$ | $q_{\max}$<br>( $\text{nm}^{-1}$ ) | $L_p$<br>(nm) | $l_c$<br>(nm) | $l_a$<br>(nm) | $\Phi_c$ | $\phi_c^{\text{lin}}$ | $q_{\max}$<br>( $\text{nm}^{-1}$ )         | $L_p$<br>(nm) | $l_c$<br>(nm) | $l_a$<br>(nm) | $\Phi_c$ | $\phi_c^{\text{lin}}$ |
| 0.0               | 1.03                               | 5.8           | 4.4           | 1.4           | 0.53     | 0.76                  | 0.94                                       | 6.2           | 4.7           | 1.5           | 0.56     | 0.76                  |
| 0.1               | 0.99                               | 6.1           | 4.7           | 1.4           | 0.55     | 0.77                  | 0.78                                       | 8.7           | 5.1           | 3.6           | 0.51     | 0.58                  |
| 0.2               | 0.92                               | 6.5           | 4.8           | 1.7           | 0.56     | 0.75                  | 0.72                                       | 9.8           | 5.7           | 4.1           | 0.46     | 0.58                  |
| 0.3               | 0.89                               | 6.7           | 4.9           | 1.8           | 0.60     | 0.72                  | 0.86                                       | 7.3           | 5.4           | 1.9           | 0.41     | 0.75                  |

5. Digital images of the spherulites

Digital images of unprocessed PHBV, processed PHBV, and its formulations with PLAP isothermally crystallized at 55, 65, and 75 °C are presented in Figure S7.

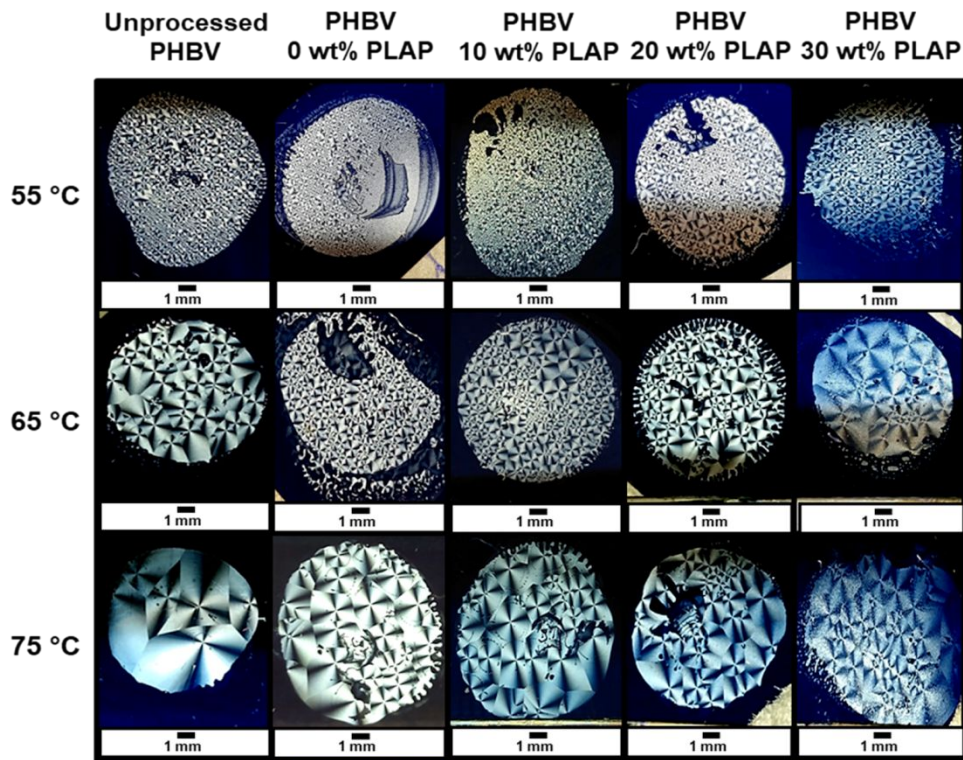

Figure S7: Digital images of unprocessed PHBV, processed PHBV, and its formulations with PLAP isothermally crystallized at 55, 65, and 75 °C.

## 6. Determination of the Flory-Huggins interaction parameter

The depression in the melting point of the plasticized PHBV was investigated according to the Flory-Huggins theory and the Nishi-Wang equation<sup>68</sup> (Equation 4):

$$\left(\frac{1}{T'_m} - \frac{1}{T_m^o}\right) = - \left(\frac{RV_{2u}}{\Delta H_{2u}V_{1u}}\right) * \left[\left(\frac{\ln\phi_2}{Dp_2}\right) + \left(\frac{1}{Dp_2} - \frac{1}{Dp_1}\right)\phi_1 + \chi_{12}\phi_1^2\right] \text{ Equation S4}$$

where,  $T'_m$  and  $T_m^o$  are the melting temperatures of the plasticized and pure PHBV, respectively. Subscript 1 denotes the plasticizer PLAP and subscript 2 the PHBV.  $V_u$  is the molar volume of the mers,  $\Delta H_u$  is the enthalpy of melting per mole of mers,  $Dp$  is the degree of polymerization,  $R$  is the universal gas constant,  $\phi$  is the volume fraction, and  $\chi_{1,2}$  is the Flory-Huggins interaction parameter. Rearranging equation S4 gives the following:

$$- \left[\left(\frac{\Delta H_{2u}V_{1u}}{RV_{2u}}\right)\left(\frac{1}{T'_m} - \frac{1}{T_m^o}\right)\right] - \left(\frac{\ln\phi_2}{Dp_2}\right) - \left(\frac{1}{Dp_2} - \frac{1}{Dp_1}\right)\phi_1 = \beta = \chi_{1,2}\phi_1^2 \quad \text{Equation S5}$$

$\chi_{1,2}$  is the slope of the curve of  $\beta$  as a function of  $\phi_1^2$  (Figure S8).

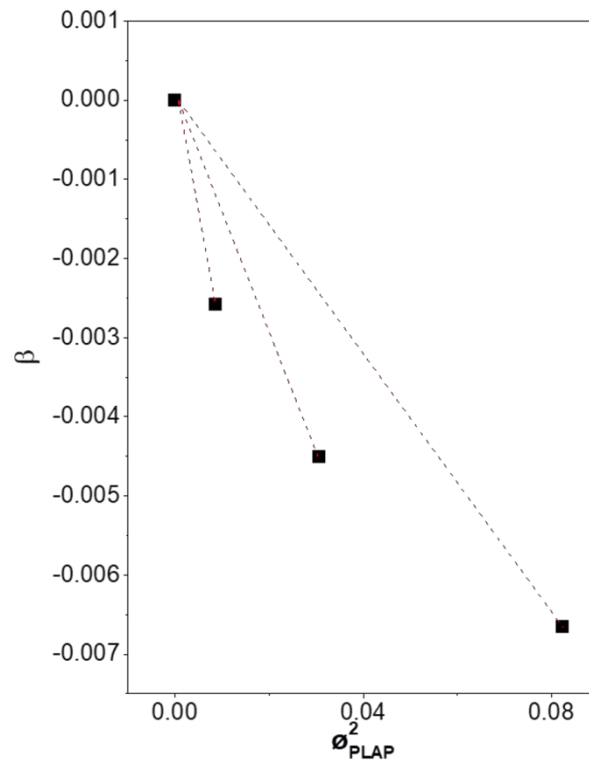

Figure S8: Plot of  $\beta$  vs  $\phi^2_{PLAP}$  according to Equation S5.

## 7. Mechanical properties

Table S4 summarizes the results from the Izod impact resistance and tensile test analysis.

Table S4: Izod impact resistance, elastic modulus, tensile strength, and elongation at break for the specimens of PHBV and its formulations with PLAP mass fractions of 0.1, 0.2, and 0.3.

| $W_{\text{PLAP}}$ | Izod Impact Resistance ( $\text{J m}^{-1}$ ) | Elastic Modulus (MPa) | Tensile Strength (MPa) | Strain at Break (%) |
|-------------------|----------------------------------------------|-----------------------|------------------------|---------------------|
| 0.0               | $96 \pm 10$                                  | $586 \pm 28$          | $30.5 \pm 1.4$         | $8.0 \pm 0.0$       |
| 0.1               | $130 \pm 20$                                 | $502 \pm 16$          | $26.3 \pm 0.3$         | $8.2 \pm 0.4$       |
| 0.2               | $224 \pm 60$                                 | $428 \pm 35$          | $22.2 \pm 1.2$         | $8.1 \pm 0.4$       |
| 0.3               | $212 \pm 40$                                 | $381 \pm 22$          | $18.9 \pm 0.4$         | $6.6 \pm 0.5$       |

## 10. Efficiency of plasticizers – a short review

To compare our data with data from literature for low molar mass and oligomeric plasticizers for PHB and PHBV, we choose the following parameters:

1. Depression of  $T_g$  expressed as

$$\Delta T_g = T_{g(\text{Formulation})} - T_{g(\text{Matrix})} \text{ (}^\circ\text{C)} \quad \text{Equation S6}$$

2. Depression of  $T_m$  expressed as

$$\Delta T_m = T_{m(\text{Formulation})} - T_{m(\text{Matrix})} \text{ (}^\circ\text{C)} \quad \text{Equation S7}$$

3. Percent change in the elastic modulus,  $E$ , expressed as

$$\Delta E = \left( \frac{E_{(\text{Formulation})} - E_{(\text{Matrix})}}{E_{(\text{Matrix})}} \right) \times 100 \quad \text{Equation S8}$$

4. Percent change in the elongation at break,  $\varepsilon$ , expressed as

$$\Delta \varepsilon = \varepsilon_{\text{Formulation}} - \varepsilon_{\text{Matrix}} \quad \text{Equation S9}$$

These data for oligomeric and molecular plasticized PHB and PHBV are compiled in Tables S5 and S6, respectively.

Table S5: Efficiency of oligomeric plasticizers for decreasing  $T_g$  and  $T_m$  and for tuning the mechanical properties of the PHB and PHBV formulations.

| Matrix                        | Plasticizer                                         | Mass fraction | $\Delta T_g$ (°C) | $\Delta T_m$ (°C) | $\Delta E$ (%) | $\Delta \varepsilon$ (%) | Reference |
|-------------------------------|-----------------------------------------------------|---------------|-------------------|-------------------|----------------|--------------------------|-----------|
| PHBV (3% HV, $M_w = 250$ kDa) | PLAP ( $M_w = 6.5$ kDa)                             | 0.1           | -3                | -1                | -14            | 0.2                      | this work |
| PHBV (3% HV, $M_w = 250$ kDa) | PLAP ( $M_w = 6.5$ kDa)                             | 0.2           | -6                | -2                | -27            | 0.1                      | this work |
| PHBV (3% HV, $M_w = 250$ kDa) | PLAP ( $M_w = 6.5$ kDa)                             | 0.3           | -11               | -3                | -35            | -1.4                     | this work |
| PHBV (3% HV, $M_w = 250$ kDa) | PEG1000                                             | 0.1           | n.d.              | -1                | -37            | 0.8                      | 24        |
| PHBV (3% HV, $M_w = 250$ kDa) | PEG1000                                             | 0.2           | n.d.              | 0                 | -28            | 0.2                      | 24        |
| PHB                           | Poly(adipate) ( $M_n = 3.8$ kDa)                    | 0.1           | -9                | -4                | -25            | -0.2                     | 32        |
| PHB                           | Poly(adipate) ( $M_n = 3.8$ kDa)                    | 0.2           | -17               | -5                | -43            | 1.8                      | 32        |
| PHB                           | Poly(adipate) ( $M_n = 3.8$ kDa)                    | 0.3           | -32               | -7                | -53            | 3.5                      | 32        |
| PHBV (8% HV)                  | PEG200                                              | 0.1           | 0,0               | -5                | -14            | 0.4                      | 39        |
| PHBV (8% HV)                  | PEG1000                                             | 0.1           | 0,0               | -2                | -31            | 0.8                      | 39        |
| PHBV (8% HV)                  | PEG4000                                             | 0.1           | 0,0               | -2                | -30            | 0.3                      | 39        |
| PHBV (3% HV)                  | PEG400                                              | 0.1           | -15               | -6                | -56            | 4.0                      | 45        |
| PHBV (3% HV)                  | PEG1000                                             | 0.1           | n.d.              | -4                | -37            | 2.7                      | 45        |
| PHBV (3% HV)                  | PEG4000                                             | 0.1           | n.d.              | -2                | -48            | 2.8                      | 45        |
| PHB ( $M_w = 600$ kDa)        | Poly[di(ethyleneglycol) adipate] ( $M_n = 2.5$ kDa) | 0.1           | -10               | -1                | 0              | 0.0                      | 46        |
| PHB ( $M_w = 600$ kDa)        | Poly[di(ethyleneglycol) adipate] ( $M_n = 2.5$ kDa) | 0.2           | -13               | -2                | -25            | 0.0                      | 46        |
| PHB ( $M_w = 600$ kDa)        | Poly[di(ethyleneglycol) adipate] ( $M_n = 2.5$ kDa) | 0.3           | -15               | -2                | -28            | 1.0                      | 46        |
| PHB                           | PEG4000                                             | 0.1           | n.d.              | -5                | -36            | -0.2                     | 47        |
| PHB                           | PEG6000                                             | 0.1           | n.d.              | -3                | -27            | 0.7                      | 47        |
| PHB ( $M_n = 190$ kDa)        | PEG300                                              | 0.1           | -15               | -3                | n.d.           | 7.0                      | 49        |
| PHB ( $M_n = 190$ kDa)        | Laprol 503                                          | 0.1           | -13               | -1                | n.d.           | 7.0                      | 49        |
| PHB ( $M_n = 190$ kDa)        | Laprol 5003 ( $M_n = 5.0$ kDa)                      | 0.1           | -1                | 2                 | n.d.           | 7.0                      | 49        |
| PHB ( $M_n = 190$ kDa)        | PHB ( $M_w = 3.6$ kDa)                              | 0.1           | n.d.              | 0                 | -22            | -0.9                     | 63        |
| PHB ( $M_n = 190$ kDa)        | PHB ( $M_w = 3.6$ kDa)                              | 0.2           | n.d.              | 0                 | -12            | -3.3                     | 63        |
| PHB ( $M_n = 190$ kDa)        | PHB-diol ( $M_w = 1.8$ kDa)                         | 0.2           | -12               | -11               | n.d.           | 3.0                      | 64        |
| PHB                           | atactic PHB ( $M_n = 0.6$ kDa)                      | 0.1           | -30               | -4                | n.d.           | n.d.                     | 65        |
| PHB                           | atactic PHB ( $M_n = 0.6$ kDa)                      | 0.3           | -52               | -8                | n.d.           | n.d.                     | 65        |
| PHB                           | atactic PHB ( $M_n = 2.7$ kDa)                      | 0.1           | -18               | -2                | n.d.           | n.d.                     | 65        |
| PHB                           | atactic PHB ( $M_n = 2.7$ kDa)                      | 0.3           | -23               | -6                | n.d.           | n.d.                     | 65        |
| PHB                           | medium-chain-length PHA ( $M_n = 4.6$ kDa)          | 0.1           | n.d.              | -0,9              | -38            | -5.0                     | 66        |
| PHB                           | medium-chain-length PHA ( $M_n = 4.6$ kDa)          | 0.2           | n.d.              | -7,6              | -62            | 2.0                      | 66        |

Continuation of Table S5.

| <b>Matrix</b>                 | <b>Plasticizer</b>                | <b>Mass fraction</b> | <b><math>\Delta T_g</math> (°C)</b> | <b><math>\Delta T_m</math> (°C)</b> | <b><math>\Delta E</math> (%)</b> | <b><math>\Delta \epsilon</math> (%)</b> | <b>Reference</b> |
|-------------------------------|-----------------------------------|----------------------|-------------------------------------|-------------------------------------|----------------------------------|-----------------------------------------|------------------|
| PHB ( $M_w = 370$ kDa)        | Pluronic F68 ( $M_w = 8.4$ kDa)   | 0.2                  | -10                                 | -2                                  | 20                               | -12,6                                   | 67               |
| PHB ( $M_w = 370$ kDa)        | Pluronic F127 ( $M_w = 12.6$ kDa) | 0.2                  | -10                                 | -3                                  | n.d.                             | n.d.                                    | 67               |
| PHBV (5% HV, $M_n = 300$ kDa) | Poly(caprolactone)-triol          | 0.1                  | -11                                 | -2                                  | n.d.                             | n.d.                                    | 69               |
| PHBV (5% HV, $M_n = 300$ kDa) | Poly(caprolactone)-triol          | 0.2                  | -12                                 | -6                                  | n.d.                             | n.d.                                    | 69               |
| PHBV (5% HV, $M_n = 300$ kDa) | Poly(caprolactone)-triol          | 0.3                  | -12                                 | -8                                  | n.d.                             | n.d.                                    | 69               |
| PHB (ENMAT Y1000)             | Tolonate X FLO100                 | 0.1                  | n.d.                                | 0                                   | -1                               | 2.0                                     | 70               |
| PHB (ENMAT Y1000)             | Tolonate X FLO100                 | 0.2                  | n.d.                                | -1                                  | -20                              | 4.0                                     | 70               |

n.d. – not determined.



Table S6: Efficiency of low molar mass plasticizers for decreasing  $T_g$  and  $T_m$  and for tuning the mechanical properties of PHB and PHBV.

| Matrix                 | Plasticizer                       | Mass fraction | $\Delta T_g$ (°C) | $\Delta T_m$ (°C) | $\Delta E$ (%) | $\Delta \epsilon$ (%) | Reference |
|------------------------|-----------------------------------|---------------|-------------------|-------------------|----------------|-----------------------|-----------|
| PHB ( $M_n = 330$ kDa) | Diethyl sebacate                  | 0.3           | -10               | -5                | -75            | 1,8                   | 31        |
| PHB ( $M_n = 330$ kDa) | Acetyl tributyl citrate           | 0.1           | -16               | -6                | -9             | 3,6                   | 31        |
| PHB ( $M_n = 330$ kDa) | Acetyl tributyl citrate           | 0.2           | -35               | -9                | -55            | 6,0                   | 31        |
| PHB ( $M_n = 330$ kDa) | Acetyl tributyl citrate           | 0.3           | -37               | -12               | -87            | 7,2                   | 31        |
| PHB                    | Diethyl phthalate                 | 0.1           | -9,5              | -5                | -39            | 3,5                   | 32        |
| PHB                    | Diethyl phthalate                 | 0.2           | -10,1             | -6                | -51            | 3,1                   | 32        |
| PHB                    | Diethyl phthalate                 | 0.3           | -11,5             | -9                | -63            | 1,6                   | 32        |
| PHB                    | Diethyl adipate                   | 0.1           | -7,7              | -3                | -18            | -1,3                  | 32        |
| PHB                    | Diethyl adipate                   | 0.2           | -7,6              | -6                | -37            | -0,8                  | 32        |
| PHB                    | Diethyl adipate                   | 0.3           | -7,5              | -6                | -39            | -2,7                  | 32        |
| PHB                    | Triacetyl glycerol                | 0.1           | -10,4             | -6                | -43            | 0,4                   | 32        |
| PHB                    | Triacetyl glycerol                | 0.2           | -17,4             | -11               | -74            | 3,3                   | 32        |
| PHB ( $M_w = 800$ kDa) | Salicylic acid decyl ester        | 0.3           | -38               | n.d.              | -72            | 102,0                 | 35        |
| PHB ( $M_w = 800$ kDa) | Salicylic acid 2-butyloctyl ester | 0.3           | -38               | n.d.              | -73            | 20,0                  | 35        |
| PHB ( $M_w = 800$ kDa) | Acetylsalicylic acid hexyl ester  | 0.3           | -24               | n.d.              | -77            | 124,0                 | 35        |
| PHB ( $M_w = 800$ kDa) | Acetylsalicylic acid dextyl ester | 0.3           | -17               | n.d.              | -72            | 32,0                  | 35        |
| PHB ( $M_w = 800$ kDa) | Ketoprofen ethyl ester            | 0.3           | -24               | n.d.              | -80            | 56,0                  | 35        |
| PHB ( $M_w = 800$ kDa) | Triethyl citrate                  | 0.3           | -34               | n.d.              | -68            | 19,0                  | 35        |
| PHB ( $M_w = 800$ kDa) | Butyryltriethyl citrate           | 0.3           | -33               | n.d.              | -73            | 30,0                  | 35        |
| PHBV (8% HV)           | Lauric acid                       | 0.1           | 0                 | -5                | -11            | 0,1                   | 39        |
| PHBV (8% HV)           | Stearic acid                      | 0.1           | 0                 | -8                | -22            | -0,7                  | 39        |
| PHB ( $M_w = 670$ kDa) | Glycerol triacetate               | 0.2           | -23,5             | -13,2             | -58            | 59                    | 43        |
| PHB ( $M_w = 670$ kDa) | Glycerol tripropionate            | 0.2           | -30,3             | -12,8             | -41            | 5                     | 43        |
| PHB ( $M_w = 670$ kDa) | Glycerol tributyrate              | 0.2           | -30,8             | -12,1             | -61            | 21                    | 43        |
| PHB ( $M_w = 670$ kDa) | Glycerol tricaproate              | 0.2           | -20,6             | -6,3              | -49            | 17                    | 43        |
| PHB ( $M_w = 670$ kDa) | Glycerol tricaprilate             | 0.2           | -16,3             | -4,2              | -53            | 32                    | 43        |
| PHB ( $M_w = 670$ kDa) | Glycerol trilaurate               | 0.2           | -2,4              | -0,2              | -60            | 4                     | 43        |
| PHB ( $M_w = 670$ kDa) | Glycerol tripalmitate             | 0.2           | -1,4              | -1,1              | -34            | -1                    | 43        |
| PHB ( $M_w = 670$ kDa) | Glycerol tristearate              | 0.2           | -3,2              | -0,3              | -18            | -3                    | 43        |
| PHB ( $M_w = 670$ kDa) | Glycerol diacetate                | 0.2           | -25,9             | -11,2             | -23            | 14                    | 43        |
| PHB ( $M_w = 670$ kDa) | Glycerol dilaurate                | 0.2           | -18,7             | -5,7              | -21            | -2                    | 43        |
| PHB ( $M_w = 670$ kDa) | Glycerol monoacetate              | 0.2           | -1,8              | -11,9             | -26            | -3                    | 43        |
| PHB ( $M_w = 670$ kDa) | Glycerol monolaurate              | 0.2           | -6,6              | -12,9             | -53            | 0                     | 43        |
| PHB ( $M_w = 670$ kDa) | Glycerol monostearate             | 0.2           | -23,6             | -14,7             | -49            | 15                    | 43        |

Continuation of Table S6.

| Matrix                 | Plasticizer             | Mass fraction | $\Delta T_g$ (°C) | $\Delta T_m$ (°C) | $\Delta E$ (%) | $\Delta \varepsilon$ (%) | Reference |
|------------------------|-------------------------|---------------|-------------------|-------------------|----------------|--------------------------|-----------|
| PHB ( $M_w = 600$ kDa) | Glyceryl tributyrate    | 0.1           | -5                | -1                | 0              | 1,0                      | 46        |
| PHB ( $M_w = 600$ kDa) | Glyceryl tributyrate    | 0.2           | -5                | 0                 | -13            | 2,0                      | 46        |
| PHB ( $M_w = 600$ kDa) | Glyceryl tributyrate    | 0.3           | -10               | -2                | -16            | 6,0                      | 46        |
| PHB                    | Acetyl tributyl citrate | 0.1           | n.d.              | -6                | -36            | 2,2                      | 47        |
| PHB                    | Epoxidized soybean oil  | 0.1           | n.d.              | -4                | -23            | 1,8                      | 47        |
| PHB ( $M_n = 190$ kDa) | Dibutyl sebacate        | 0.1           | -13               | -5                | n.d.           | 7,0                      | 49        |
| PHB ( $M_n = 190$ kDa) | Diethyl sebacate        | 0.1           | -5                | -2                | n.d.           | 7,0                      | 49        |
| PHB ( $M_n = 460$ kDa) | Maleinized linseed oil  | 0.1           | -1,4              | -3,8              | -15            | 0,8                      | 52        |
| PHB ( $M_n = 460$ kDa) | Maleinized linseed oil  | 0.2           | -1,2              | -4,6              | -17            | -1,5                     | 52        |
| PHB ( $M_n = 460$ kDa) | Octyl epoxy stearate    | 0.1           | 0,5               | -3,4              | -23            | 3,1                      | 52        |
| PHB ( $M_n = 460$ kDa) | Octyl epoxy stearate    | 0.2           | 0,5               | -3,9              | -23            | 1,8                      | 52        |
| PHBV (6% HV)           | Soybean oil             | 0.1           | 1                 | -3                | -22            | -1                       | 54        |
| PHBV (6% HV)           | Soybean oil             | 0.2           | 2                 | 1                 | -18            | -1,9                     | 54        |
| PHBV (6% HV)           | Soybean oil             | 0.3           | 3                 | -2                | -20            | -2,4                     | 54        |
| PHBV (6% HV)           | Epoxidized soybean oil  | 0.1           | -2                | -1                | -33            | 1,6                      | 54        |
| PHBV (6% HV)           | Epoxidized soybean oil  | 0.2           | -12               | -1                | -43            | 1,9                      | 54        |
| PHBV (6% HV)           | Epoxidized soybean oil  | 0.3           | -14               | -1                | -56            | 2,2                      | 54        |
| PHB                    | Geraniol                | 0.1           | -13               | -7                | -42            | 2,9                      | 57        |
| PHB                    | Geraniol                | 0.2           | -20               | -8                | -62            | 3,1                      | 57        |
| PHB                    | Linalool                | 0.1           | -11               | -6                | -44            | 3,0                      | 57        |
| PHB                    | Linalool                | 0.2           | -18               | -3                | -48            | 3,8                      | 57        |
| PHB                    | Geraniol acetate        | 0.1           | -17               | -6                | -52            | 5,3                      | 57        |
| PHB                    | Geraniol acetate        | 0.2           | -22               | -12               | -73            | 11,7                     | 57        |
| PHB ( $M_w = 397$ kDa) | Triethyl citrate        | 0.1           | -10               | -6                | -20            | -0,2                     | 75        |
| PHB ( $M_w = 397$ kDa) | Triethyl citrate        | 0.2           | -25               | -10               | -44            | 1,6                      | 75        |
| PHB ( $M_w = 397$ kDa) | Triethyl citrate        | 0.3           | -29               | -18               | -63            | 1,1                      | 75        |

n.d. – not determined.

8.  $^1\text{H}$  and  $^{13}\text{C}$  NMR spectra of PHBV

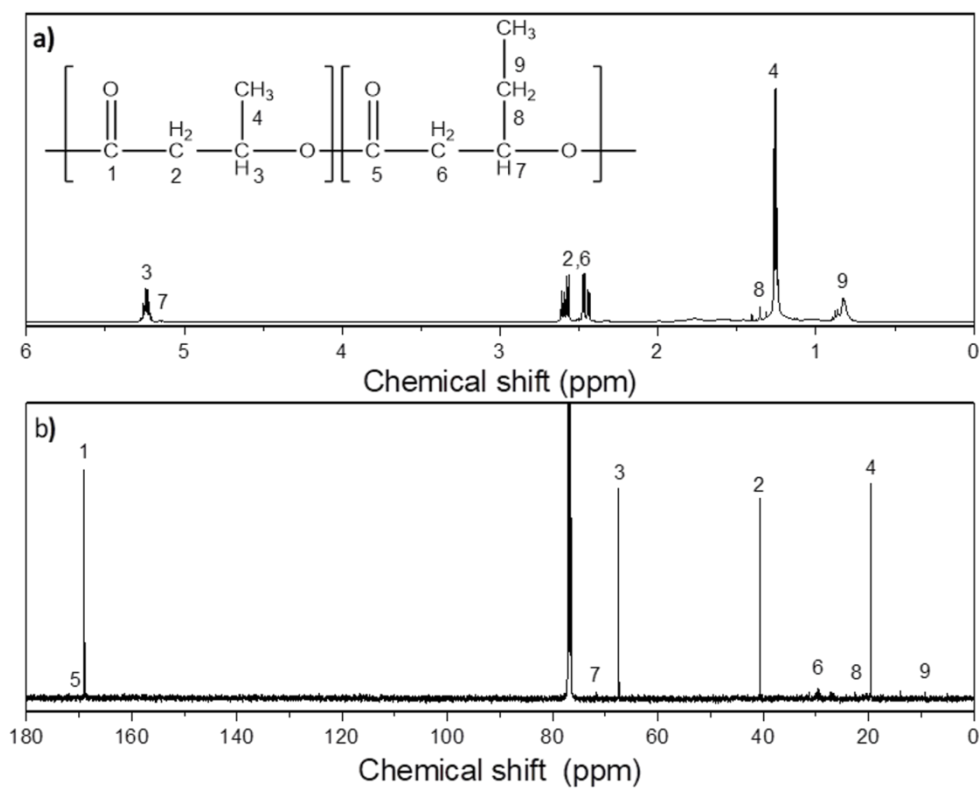

Figure S9: a)  $^1\text{H}$  and b)  $^{13}\text{C}$  NMR spectra of pure PHBV in  $\text{CDCl}_3$ .

9.  $^1\text{H}$  and  $^{13}\text{C}$  NMR spectra of PLAP

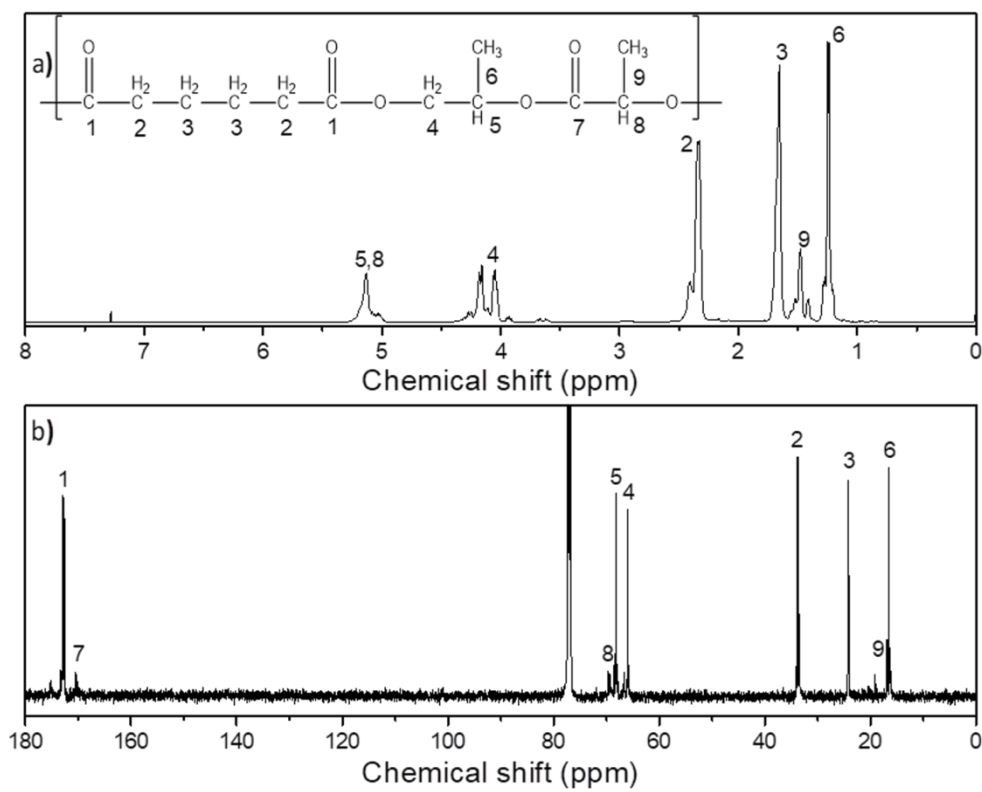

Figure S10: a)  $^1\text{H}$  and b)  $^{13}\text{C}$  NMR spectra of pure PLAP in  $\text{CDCl}_3$ .
